# Supplementary material
Source: PubMed Central journal article supplement (PMC3351911)
Supplement: cr2011139x1.pdf [file cr2011139x1.pdf]

**Supplementary Table 1 Expression of different antigens in liver cancer cell lines**

| Cell lines | Percentages of positive cells (%) <sup>a</sup> |            |           |           | Invasive abilities <sup>b</sup> |
|------------|------------------------------------------------|------------|-----------|-----------|---------------------------------|
|            | CD133                                          | CD44       | CXCR4     | uPAR      |                                 |
| HepG2      | 43.81±6.85                                     | 0.11±0.05  | 0.12±0.10 | 0.20±0.11 | +                               |
| PLC8024    | 57.34±9.64                                     | 7.15±4.31  | 0.30±0.04 | 0.23±0.14 | ++                              |
| Hep3B      | 93.83±5.67                                     | 0.73±0.27  | 0.46±0.28 | 0.31±0.06 | +                               |
| Hep3B-2    | 0.92±0.87                                      | 98.00±2.04 | 0.56±0.12 | 2.11±0.95 | +++                             |
| Huh-7      | 5.01±3.08                                      | 59.89±5.44 | 0.16±0.13 | 0.25±0.07 | ++                              |
| SMMC-7721  | 0.11±0.07                                      | 97.76±2.10 | 0.44±0.30 | 0.41±0.12 | +++                             |
| MHCC97L    | 0.26±0.10                                      | 95.29±1.38 | 2.76±0.73 | 2.31±0.72 | Not compared                    |
| MHCC97H    | 0.12±0.03                                      | 98.43±2.29 | 0.45±0.09 | 0.18±0.14 | Not compared                    |

<sup>a</sup> All data represented the mean ± SD of at least 3 independent flow cytometry analysis.

<sup>b</sup> The assessment of invasive abilities of different HCC cells were given here according to data shown in Fig. 2A. +, low abilities; ++, moderated abilities; +++, high abilities.
