# Supplementary material
Source: PubMed Central journal article supplement (PMC3351911)
Supplement: cr2011139x2.pdf [file cr2011139x2.pdf]

**Supplementary Table 2 The statistical evaluation of CD44 expression and the invasive abilities in HCC cell lines**

| <b>Comparison of CD44 expression in HCC cell lines</b> |                  |       |                  |       |                   |       |
|--------------------------------------------------------|------------------|-------|------------------|-------|-------------------|-------|
| <i>P</i> value <sup>a</sup>                            | PLC <sup>b</sup> | Hep3B | Hep3B-2          | Huh-7 | 7721 <sup>b</sup> | HepG2 |
| PLC                                                    | -                | **    | **               | **    | **                | **    |
| Hep3B                                                  | **               | -     | **               | **    | **                | *     |
| Hep3B-2                                                | **               | **    | -                | **    | <b>&gt;0.05</b>   | **    |
| Huh-7                                                  | **               | **    | **               | -     | **                | **    |
| 7721                                                   | **               | **    | <b>&gt; 0.05</b> | **    | -                 | **    |
| HepG2                                                  | **               | *     | **               | **    | **                | -     |

  

| <b>Comparison of cell invasion in HCC cell lines</b> |                 |                 |         |                 |      |                 |
|------------------------------------------------------|-----------------|-----------------|---------|-----------------|------|-----------------|
| <i>P</i> value                                       | PLC             | Hep3B           | Hep3B-2 | Huh-7           | 7721 | HepG2           |
| PLC                                                  | -               | **              | **      | <b>&gt;0.05</b> | *    | **              |
| Hep3B                                                | **              | -               | **      | *               | **   | <b>&gt;0.05</b> |
| Hep3B-2                                              | **              | **              | -       | **              | **   | **              |
| Huh-7                                                | <b>&gt;0.05</b> | *               | **      | -               | **   | **              |
| 7721                                                 | *               | **              | **      | **              | -    | **              |
| HepG2                                                | **              | <b>&gt;0.05</b> | **      | **              | **   | -               |

a. \*\*,  $P < 0.01$ ; \*,  $P < 0.05$

b. PLC: PLC8024; 7721: SMMC-7721
