# Supplementary material
Source: PubMed Central journal article supplement (PMC3351911)
Supplement: cr2011139x3.pdf [file cr2011139x3.pdf]

**Supplementary Table 3 The cell cycle of CD44<sup>high</sup> (CD44<sup>+</sup>) and CD44<sup>low/-</sup> (CD44<sup>-</sup>) subgroups isolated from HCC cell lines or primary HCC cells.**

| Cell types \ Phase |                       | G0/G1 (%) | S (%)    | G2/M (%) |
|--------------------|-----------------------|-----------|----------|----------|
|                    |                       |           |          |          |
| Huh-7              | CD44 <sup>high</sup>  | 61.7±5.2  | 27.9±3.8 | 9.83±2.4 |
|                    | CD44 <sup>low/-</sup> | 68.3±6.1  | 22±4.2   | 11.1±2.2 |
| SMMC7721           | CD44 <sup>high</sup>  | 55.2±7.3  | 31.5±6.1 | 12.8±1.2 |
|                    | CD44 <sup>low/-</sup> | 57.4±8.4  | 28.7±3.9 | 13.1±5.1 |
| MHCC97L            | CD44 <sup>high</sup>  | 53.2±6.4  | 30.8±3.8 | 15.2±1.9 |
|                    | CD44 <sup>low/-</sup> | 58.3±3.5  | 28.7±5.1 | 13.1±2.7 |
| pHCC1              | CD44 <sup>+</sup>     | 54.9±5.4  | 33.2±3.1 | 11±2.8   |
|                    | CD44 <sup>-</sup>     | 52.6±5.6  | 33.2±2.9 | 12.2±1.9 |
| pHCC2              | CD44 <sup>+</sup>     | 61.8±7.1  | 27±3.7   | 12.2±4.5 |
|                    | CD44 <sup>-</sup>     | 65.5±4.9  | 26.2±4.1 | 8.39±2.8 |
