# Supplementary material
Source: PubMed Central journal article supplement (PMC3351911)
Supplement: cr2011139x4.pdf [file cr2011139x4.pdf]

**Supplementary Table 4 Metastatic capacity of different subpopulations of SMMC-7721 and MHCC97L cell lines *in vivo***

| Cell Lines | Phenotypes <sup>a</sup>                  | No. of Mice with Tumor Formation/ Total No. of Mice with Cell Injection | No. of Mice with Tumor Metastasis/ No. of Mice with Tumor Formation |
|------------|------------------------------------------|-------------------------------------------------------------------------|---------------------------------------------------------------------|
| SMMC-7721  | CD133 <sup>+</sup> CD44 <sup>high</sup>  | 5 / 7                                                                   | 4 / 5                                                               |
|            | CD133 <sup>+</sup> CD44 <sup>low/-</sup> | 4 / 6                                                                   | 0 / 4                                                               |
|            | CD133 <sup>-</sup> CD44 <sup>high</sup>  | 0 / 6                                                                   | -                                                                   |
|            | CD133 <sup>-</sup> CD44 <sup>low/-</sup> | 0 / 6                                                                   | -                                                                   |
| MHCC97L    | CD133 <sup>+</sup> CD44 <sup>high</sup>  | 5 / 5                                                                   | 4 / 5                                                               |
|            | CD133 <sup>+</sup> CD44 <sup>low/-</sup> | 4 / 4                                                                   | 0 / 4                                                               |
|            | CD133 <sup>-</sup> CD44 <sup>high</sup>  | 0 / 6                                                                   | -                                                                   |
|            | CD133 <sup>-</sup> CD44 <sup>low/-</sup> | 0 / 6                                                                   | -                                                                   |

<sup>a</sup> A total of  $1 \times 10^4$  of sorted cells of different subpopulations from indicated cell lines was injected into the left lobe of liver in nude mice. Animals were sacrificed after 3 months and examined.
