# Supplementary material
Source: PubMed Central journal article supplement (PMC3351911)
Supplement: cr2011139x5.pdf [file cr2011139x5.pdf]

**Supplementary Table 5 In vivo tumor development experiments of different subgroup of tumor cells isolated from human HCC specimens**

|           | Cell type                            | Cell number injected | No. of Mice with Tumor Formation/ Total No. of Mice with Cell Injection |          |          |
|-----------|--------------------------------------|----------------------|-------------------------------------------------------------------------|----------|----------|
|           |                                      |                      | 1 month                                                                 | 2 months | 3 months |
|           |                                      |                      |                                                                         |          |          |
| Patient 1 | CD133 <sup>+</sup> CD44 <sup>+</sup> | 10 <sup>2</sup>      | 0/3                                                                     | 0/3      | 0/3      |
|           |                                      | 10 <sup>3</sup>      | 0/3                                                                     | 0/3      | 1/3      |
|           |                                      | 10 <sup>4</sup>      | 1/3                                                                     | 2/3      | 3/3      |
|           | CD133 <sup>+</sup> CD44 <sup>-</sup> | 10 <sup>2</sup>      | 0/3                                                                     | 0/3      | 0/3      |
|           |                                      | 10 <sup>3</sup>      | 0/3                                                                     | 0/3      | 1/3      |
|           |                                      | 10 <sup>4</sup>      | 2/3                                                                     | 2/3      | 3/3      |
|           | CD133 <sup>-</sup> CD44 <sup>+</sup> | 10 <sup>3</sup>      | 0/3                                                                     | 0/3      | 0/3      |
|           |                                      | 10 <sup>4</sup>      | 0/3                                                                     | 0/3      | 0/3      |
|           |                                      | 10 <sup>5</sup>      | 0/3                                                                     | 0/3      | 0/3      |
|           | CD133 <sup>-</sup> CD44 <sup>-</sup> | 10 <sup>3</sup>      | 0/3                                                                     | 0/3      | 0/3      |
|           |                                      | 10 <sup>4</sup>      | 0/3                                                                     | 0/3      | 0/3      |
|           |                                      | 10 <sup>5</sup>      | 0/3                                                                     | 0/3      | 0/3      |
| Patient 2 | CD133 <sup>+</sup> CD44 <sup>+</sup> | 10 <sup>2</sup>      | 0/3                                                                     | 0/3      | 0/3      |
|           |                                      | 10 <sup>3</sup>      | 0/3                                                                     | 1/3      | 1/3      |
|           |                                      | 10 <sup>4</sup>      | 0/3                                                                     | 3/3      | 3/3      |
|           | CD133 <sup>+</sup> CD44 <sup>-</sup> | 10 <sup>2</sup>      | 0/3                                                                     | 0/3      | 0/3      |
|           |                                      | 10 <sup>3</sup>      | 0/3                                                                     | 0/3      | 1/3      |
|           |                                      | 10 <sup>4</sup>      | 0/3                                                                     | 3/3      | 3/3      |
|           | CD133 <sup>-</sup> CD44 <sup>+</sup> | 10 <sup>3</sup>      | 0/3                                                                     | 0/3      | 0/3      |
|           |                                      | 10 <sup>4</sup>      | 0/3                                                                     | 0/3      | 0/3      |
|           |                                      | 10 <sup>5</sup>      | 0/3                                                                     | 0/3      | 0/3      |
|           | CD133 <sup>-</sup> CD44 <sup>-</sup> | 10 <sup>3</sup>      | 0/3                                                                     | 0/3      | 0/3      |
|           |                                      | 10 <sup>4</sup>      | 0/3                                                                     | 0/3      | 0/3      |
|           |                                      | 10 <sup>5</sup>      | 0/3                                                                     | 0/3      | 0/3      |
