# Supplementary material
Source: PubMed Central journal article supplement (PMC3351911)
Supplement: cr2011139x6.pdf [file cr2011139x6.pdf]

**Supplementary Table 6 Metastatic capacity of CD133<sup>+</sup>CD44<sup>high</sup> MHCC97L cells treated by RNAi lenti-virus targeting CD133 and CD44 *in vivo***

| Treatment                  | No. of Mice with Tumor Formation/<br>Total No. of Mice with Cell Injection | No. of Mice with Tumor Metastasis/ No. of Mice with Tumor Formation |
|----------------------------|----------------------------------------------------------------------------|---------------------------------------------------------------------|
| Empty vectors              | 5/5                                                                        | 4/5                                                                 |
| RNAi lenti-virus cocktails | 5/5                                                                        | 1/5                                                                 |

<sup>a</sup> A total of  $1 \times 10^4$  of CD133<sup>+</sup>CD44<sup>high</sup> MHCC97L cells in combine with RNAi lenti-virus particles targeting CD133 and CD44 or empty vectors was injected into the left lobe of liver in nude mice. Animals were sacrificed after 3 months and examined.
