# Supplementary material
Source: PubMed Central journal article supplement (PMC3351911)
Supplement: cr2011139x7.pdf [file cr2011139x7.pdf]

**Supplementary Table 7 Genes differentially expressed between CD133<sup>+</sup>CD44<sup>+</sup> and CD133<sup>+</sup>CD44<sup>-</sup> cells according to cDNA microarrays <sup>a</sup>**

| NCBI Accession No.                                                                                 | Gene Symbol | Description                                                                                     |
|----------------------------------------------------------------------------------------------------|-------------|-------------------------------------------------------------------------------------------------|
| <b>Up-regulated genes (CD133<sup>+</sup>CD44<sup>+</sup> vs CD133<sup>+</sup>CD44<sup>-</sup>)</b> |             |                                                                                                 |
| NM_002984                                                                                          | CCL4        | Homo sapiens chemokine ligand 4, transcript variant 1                                           |
| NM_002426                                                                                          | MMP12       | Homo sapiens matrix metalloproteinase 12                                                        |
| NM_001778                                                                                          | CD48        | Homo sapiens CD48 molecule                                                                      |
| NM_173800                                                                                          | FLJ90650    | Homo sapiens laeverin                                                                           |
| NM_001007271                                                                                       | DUSP13      | Homo sapiens dual specificity phosphatase 13, transcript variant 1                              |
| NM_006682                                                                                          | FGL2        | Homo sapiens fibrinogen-like 2                                                                  |
| NM_005825                                                                                          | RASGRP2     | Homo sapiens RAS guanyl releasing protein 2, transcript variant 1                               |
| NM_015881                                                                                          | DKK3        | Homo sapiens dickkopf homolog 3, transcript variant 1                                           |
| NM_015529                                                                                          | MOXD1       | Homo sapiens monooxygenase, DBH-like 1, transcript variant 2                                    |
| NM_001380                                                                                          | DOCK1       | Homo sapiens dedicator of cytokinesis 1                                                         |
| NM_021201                                                                                          | MS4A7       | Homo sapiens membrane-spanning 4-domains, subfamily A, member 7, transcript variant 1           |
| NM_000579                                                                                          | CCR5        | Homo sapiens chemokine receptor 5                                                               |
| NM_004951                                                                                          | EBI2        | Homo sapiens Epstein-Barr virus induced gene 2 (lymphocyte-specific G protein-coupled receptor) |
| NM_020404                                                                                          | CD248       | Homo sapiens CD248 molecule, endosialin                                                         |
| NM_001001437                                                                                       | CCL3L3      | Homo sapiens chemokine ligand 3-like 3                                                          |
| NM_001772                                                                                          | CD33        | Homo sapiens CD33 molecule, transcript variant 1                                                |
| NM_080816                                                                                          | SIRPG       | Homo sapiens signal-regulatory protein gamma, transcript variant 2                              |
| NM_007038                                                                                          | ADAMTS5     | Homo sapiens ADAM metalloproteinase with thrombospondin type 1 motif, 5 (aggrecanase-2)         |
| NM_002122                                                                                          | HLA-DQA1    | Homo sapiens major histocompatibility complex, class II, DQ alpha 1                             |
| NM_001004432                                                                                       | LINGO4      | Homo sapiens leucine rich repeat and Ig domain containing 4                                     |
| NM_003037                                                                                          | SLAMF1      | Homo sapiens signaling lymphocytic activation molecule family member 1                          |
| NM_033360                                                                                          | KRAS        | Homo sapiens v-Ki-ras2 Kirsten rat sarcoma viral oncogene homolog, transcript variant a,        |
| NM_001033580                                                                                       | MYOHD1      | Homo sapiens myosin head domain containing 1, transcript variant 3                              |
| NM_052959                                                                                          | PANX3       | Homo sapiens pannexin 3                                                                         |

Other genes without gene symbol BG207267, A\_32\_P205522, AI492422, DB325746, TRBV5-4, THC2689427, DQ168992, AI433842, AK021933

**Down-regulated genes (CD133<sup>+</sup>CD44<sup>+</sup> vs CD133<sup>+</sup>CD44<sup>-</sup>)**

|              |           |                                                                                                                               |
|--------------|-----------|-------------------------------------------------------------------------------------------------------------------------------|
| NM_080676    | C20orf133 | Homo sapiens chromosome 20 open reading frame 133 , transcript variant 1                                                      |
| NM_024584    | CCDC121   | Homo sapiens coiled-coil domain containing 121                                                                                |
| NM_005578    | LPP       | Homo sapiens LIM domain containing preferred translocation partner in lipoma                                                  |
| NM_031850    | AGTR1     | Homo sapiens angiotensin II receptor, type 1, transcript variant 4                                                            |
| NM_014616    | ATP11B    | Homo sapiens ATPase, Class VI, type 11B                                                                                       |
| NM_058230    | ZNF354B   | Homo sapiens zinc finger protein 354B                                                                                         |
| NM_004263    | SEMA4F    | Homo sapiens sema domain, immunoglobulin domain (Ig), transmembrane domain (TM) and short cytoplasmic domain, (semaphorin) 4F |
| NM_175876    | EXOC8     | Homo sapiens exocyst complex component 8                                                                                      |
| NM_153235    | TXLNB     | Homo sapiens taxilin beta                                                                                                     |
| NM_002948    | RPL15     | Homo sapiens ribosomal protein L15                                                                                            |
| NM_173694    | ATP11C    | Homo sapiens ATPase, Class VI, type 11C, transcript variant 1                                                                 |
| NM_000370    | TTPA      | Homo sapiens tocopherol (alpha) transfer protein (ataxia (Friedreich-like) with vitamin E deficiency)                         |
| NM_004755    | RPS6KA5   | Homo sapiens ribosomal protein S6 kinase, 90kDa, polypeptide 5, transcript variant 1,                                         |
| NM_030941    | LOC81691  | Homo sapiens exonuclease NEF-sp                                                                                               |
| NM_003837    | FBP2      | Homo sapiens fructose-1,6-bisphosphatase 2                                                                                    |
| NM_016297    | PCYOX1    | Homo sapiens prenylcysteine oxidase 1                                                                                         |
| NM_006203    | PDE4D     | Homo sapiens phosphodiesterase 4D, cAMP-specific (phosphodiesterase E3 dunce homolog, Drosophila)                             |
| NM_015035    | ZHX3      | Homo sapiens zinc fingers and homeoboxes 3                                                                                    |
| NM_144706    | C2orf15   | Homo sapiens chromosome 2 open reading frame 15                                                                               |
| NM_000824    | GLRB      | Homo sapiens glycine receptor, beta                                                                                           |
| NM_015180    | SYNE2     | Homo sapiens spectrin repeat containing, nuclear envelope 2, transcript variant 1                                             |
| NM_003796    | C19orf2   | Homo sapiens chromosome 19 open reading frame 2, transcript variant 1                                                         |
| NM_004484    | GPC3      | Homo sapiens glypican 3                                                                                                       |
| NM_139004    | HFE       | Homo sapiens hemochromatosis, transcript variant 4                                                                            |
| NM_001002909 | GPATCH8   | Homo sapiens G patch domain containing 8                                                                                      |
| NM_000066    | C8B       | Homo sapiens complement component 8, beta polypeptide                                                                         |
| NM_017913    | CDC37L1   | Homo sapiens cell division cycle 37 homolog-like 1                                                                            |
| NM_000186    | CFH       | Homo sapiens complement factor H, transcript variant 1                                                                        |
| NM_153451    | ORAOV1    | Homo sapiens oral cancer overexpressed 1                                                                                      |
| NM_020951    | ZNF529    | Homo sapiens zinc finger protein 529                                                                                          |

|                                     |           |                                                                                                                                                |
|-------------------------------------|-----------|------------------------------------------------------------------------------------------------------------------------------------------------|
| NM_024594                           | PANK3     | Homo sapiens pantothenate kinase 3                                                                                                             |
| NM_006305                           | ANP32A    | Homo sapiens acidic (leucine-rich) nuclear phosphoprotein 32 family, member A                                                                  |
| NM_020750                           | XPO5      | Homo sapiens exportin 5                                                                                                                        |
| NM_020156                           | C1GALT1   | Homo sapiens core 1 synthase, glycoprotein-N-acetylgalactosamine 3-beta-galactosyltransferase, 1                                               |
| NM_006704                           | SUGT1     | Homo sapiens SGT1, suppressor of G2 allele of SKP1                                                                                             |
| NM_018424                           | EPB41L4B  | Homo sapiens erythrocyte membrane protein band 4.1 like 4B, transcript variant 1                                                               |
| NM_024558                           | C14orf138 | Homo sapiens chromosome 14 open reading frame 138, transcript variant 1                                                                        |
| NM_012089                           | ABCB10    | Homo sapiens ATP-binding cassette, sub-family B (MDR/TAP), member 10, nuclear gene encoding mitochondrial protein                              |
| NM_018340                           | FLJ11151  | Homo sapiens hypothetical protein FLJ11151                                                                                                     |
| NM_194430                           | RNASE4    | Homo sapiens ribonuclease, RNase A family, 4, transcript variant 1                                                                             |
| NM_144566                           | ZNF700    | Homo sapiens zinc finger protein 700                                                                                                           |
| NM_032788                           | ZNF514    | Homo sapiens zinc finger protein 514                                                                                                           |
| NM_138811                           | C7orf31   | Homo sapiens chromosome 7 open reading frame 31                                                                                                |
| NM_145686                           | MAP4K4    | Homo sapiens mitogen-activated protein kinase kinase kinase 4, transcript variant 2,                                                           |
| NM_007350                           | PHLDA1    | Homo sapiens pleckstrin homology-like domain, family A, member 1                                                                               |
| NM_153186                           | ANKRD15   | Homo sapiens ankyrin repeat domain 15, transcript variant 2,                                                                                   |
| NM_004508                           | IDI1      | Homo sapiens isopentenyl-diphosphate delta isomerase 1                                                                                         |
| NM_152279                           | ZNF585B   | Homo sapiens zinc finger protein 585B                                                                                                          |
| NM_015650                           | TRAF3IP1  | Homo sapiens TNF receptor-associated factor 3 interacting protein 1                                                                            |
| NM_172201                           | KCNE2     | Homo sapiens potassium voltage-gated channel, Isk-related family, member 2                                                                     |
| NM_001017392                        | SFRS14    | Homo sapiens splicing factor, arginine/serine-rich 14, transcript variant 1                                                                    |
| NM_018172                           | FAM86C    | Homo sapiens family with sequence similarity 86, member C, transcript variant 1                                                                |
| Other genes without the gene symbol |           | THC2648472, FAM86C, BX094072, AK125038, THC2633747, CR749547, AK094156, AK022030, AK026194, LOC440900, LOC81691, AK002023, AK124097, LOC646161 |

a. The differentiated genes were selected based on the  $p$ -value of a  $t$ -test comparing the differences in expression values between CD133<sup>+</sup>CD44<sup>+</sup> and CD133<sup>+</sup>CD44<sup>-</sup> cells, following the criteria:  $P \leq 0.05$  and fold change  $\geq 2$ .
