# Supplementary material
Source: PubMed Central journal article supplement (PMC3351911)
Supplement: cr2011139x8.pdf [file cr2011139x8.pdf]

**Supplementary Table 8 Correlation analysis between expression of CD133 and CD44 and clinical-pathological parameters of HCC patients.**

|                        | Patients | CD133     |    |    | <i>P</i> value | CD133     |    |   | <i>P</i> value | CD44      |    |   | <i>P</i> value |
|------------------------|----------|-----------|----|----|----------------|-----------|----|---|----------------|-----------|----|---|----------------|
|                        |          | IHC score |    |    |                | intensity |    |   |                | IHC score |    |   |                |
|                        |          | 0         | 1  | 2  |                | n         | e  | i |                | 0         | 1  | 2 |                |
| <b>Gender</b>          |          |           |    |    |                |           |    |   |                |           |    |   |                |
| Male                   | 38       | 3         | 23 | 12 | 0.099          | 3         | 30 | 5 | 0.012          | 8         | 24 | 6 | 0.232          |
| Female                 | 10       | 3         | 3  | 4  |                | 3         | 3  | 4 |                | 1         | 9  | 0 |                |
| <b>Tumor size</b>      |          |           |    |    |                |           |    |   |                |           |    |   |                |
| □ 3 cm                 | 14       | 2         | 10 | 2  | 0.193          | 2         | 11 | 1 | 0.417          | 2         | 10 | 2 | 0.869          |
| > 3 cm                 | 34       | 3         | 17 | 14 |                | 4         | 22 | 8 |                | 7         | 25 | 4 |                |
| <b>TNM grade</b>       |          |           |    |    |                |           |    |   |                |           |    |   |                |
| I                      | 15       | 2         | 10 | 3  | 0.087          | 2         | 12 | 1 | 0.028          | 2         | 11 | 2 | 0.149          |
| II                     | 8        | 3         | 3  | 2  |                | 3         | 2  | 3 |                | 3         | 5  | 0 |                |
| III or IV              | 25       | 1         | 13 | 11 |                | 1         | 19 | 5 |                | 4         | 17 | 4 |                |
| <b>AFP</b>             |          |           |    |    |                |           |    |   |                |           |    |   |                |
| Negative, □ 20 ng/ml   | 18       | 3         | 9  | 6  | 0.782          | 3         | 11 | 4 | 0.660          | 3         | 13 | 2 | 0.922          |
| Positive, > 20 ng/ml   | 30       | 3         | 17 | 10 |                | 3         | 22 | 5 |                | 6         | 20 | 4 |                |
| <b>Capsules</b>        |          |           |    |    |                |           |    |   |                |           |    |   |                |
| Integrated             | 14       | 2         | 9  | 3  | 0.531          | 2         | 9  | 3 | 0.912          | 6         | 7  | 1 | 0.022          |
| Infiltration or none   | 34       | 4         | 17 | 13 |                | 4         | 24 | 6 |                | 3         | 26 | 5 |                |
| <b>Edmondson Grade</b> |          |           |    |    |                |           |    |   |                |           |    |   |                |
| II                     | 2        | 0         | 2  | 0  | 0.414          | 0         | 2  | 0 | 0.622          | 1         | 1  | 0 | 0.483          |
| III                    | 46       | 6         | 24 | 16 |                | 6         | 31 | 9 |                | 8         | 32 | 6 |                |
