# Supplementary material
Source: PubMed Central journal article supplement (PMC3351911)
Supplement: cr2011139x9.pdf [file cr2011139x9.pdf]

## Supplementary Table 9 Clinical data of human liver cancer samples for histology

### analysis

| Patients <sup>a</sup>                                                      | Gender <sup>b</sup> | Age | Tumor size<br>(cm) | Edmondson<br>Grade | TNM<br>Grade | Capsules <sup>c</sup> |
|----------------------------------------------------------------------------|---------------------|-----|--------------------|--------------------|--------------|-----------------------|
| HCC without metastasis (NM group in IHC investigation)                     |                     |     |                    |                    |              |                       |
| 1                                                                          | M                   | 61  | 5.0×4.5            | III                | II           | +                     |
| 2                                                                          | F                   | 68  | 7.6×6.0            | II                 | II           | +                     |
| 3                                                                          | M                   | 43  | 7.8×6.0            | III                | II           | ++                    |
| 4                                                                          | M                   | 71  | 8.2×5.4            | III                | II           | +++                   |
| 5                                                                          | M                   | 43  | 4.0×3.1            | III                | I            | +                     |
| 6                                                                          | M                   | 49  | 5.5×5.4            | III                | II           | +                     |
| 7                                                                          | M                   | 61  | 5.5×4.0            | II                 | II           | +                     |
| 8                                                                          | M                   | 57  | 5.0×4.0            | III                | II           | +++                   |
| 9                                                                          | F                   | 67  | 11.0×10.0          | III                | II           | ++                    |
| 10                                                                         | M                   | 43  | 1.9×1.3            | III-IV             | I            | +                     |
| 11                                                                         | M                   | 63  | 7.1×6.9            | III                | II           | +                     |
| 12                                                                         | F                   | 16  | 13.0×9.5           | III                | II           | +                     |
| 13                                                                         | F                   | 34  | 3.5×1.6            | III                | I            | +++                   |
| 14                                                                         | F                   | 53  | 2.4×2.0            | III                | I            | +++                   |
| 15                                                                         | F                   | 71  | 4.5×4.0            | III                | II           | +++                   |
| 16                                                                         | M                   | 43  | 12.0×10.0          | III                | II           | +                     |
| 17                                                                         | M                   | 49  | 2.6×1.7            | III                | I            | +++                   |
| 18                                                                         | M                   | 55  | 2.7×2.5            | III                | I            | +                     |
| 19                                                                         | M                   | 38  | 1.5×1.2            | II                 | I            | +++                   |
| 20                                                                         | M                   | 41  | 1.6×1.2            | III                | I            | +++                   |
| 21                                                                         | M                   | 45  | 2.8×2.0            | III                | I            | +++                   |
| 22                                                                         | M                   | 37  | 2.0×1.8            | III                | I            | +                     |
| 23                                                                         | M                   | 49  | 2.8×1.6            | III                | I            | +++                   |
| 24                                                                         | M                   | 38  | 2.5×1.6            | III                | I            | +++                   |
| 25                                                                         | F                   | 57  | 2.2×1.9            | III                | I            | +++                   |
| 26                                                                         | M                   | 54  | 2.0×2.0            | III                | I            | +                     |
| 27                                                                         | M                   | 33  | 2.0×1.5            | III                | I            | +++                   |
| 28                                                                         | M                   | 60  | 2.6×2.0            | III                | I            | +                     |
| HCC with portal vein tumor thrombi (M and PVTT group in IHC investigation) |                     |     |                    |                    |              |                       |
| 29                                                                         | M                   | 43  | 8.0×9.0            | III                | III          | +++                   |
| 30                                                                         | M                   | 57  | 16.0×12.0          | III                | III          | +++                   |
| 31                                                                         | M                   | 57  | 16.0×9.0           | III                | III          | +++                   |
| 32                                                                         | F                   | 61  | 4.5×4.0            | III                | III          | +++                   |
| 33                                                                         | M                   | 57  | 4.0×3.0            | III                | III          | +++                   |
| 34                                                                         | M                   | 48  | 6.5×4.5            | III                | III          | +++                   |
| 35                                                                         | M                   | 54  | 11.0×11.0          | III                | III          | +++                   |
| 36                                                                         | M                   | 51  | 10.0×12.0          | III                | III          | +++                   |

|                                                             |   |    |           |        |     |     |
|-------------------------------------------------------------|---|----|-----------|--------|-----|-----|
| 37                                                          | M | 36 | 6.0×7.0   | III    | III | +++ |
| 38                                                          | M | 40 | 6.5×4.5   | III    | III | +++ |
| 39                                                          | M | 22 | 10.0×10.0 | III    | III | +++ |
| 40                                                          | F | 52 | 4.6×4.0   | III    | III | +++ |
| 41                                                          | M | 66 | 9.0×8.0   | III    | III | +++ |
| 42                                                          | M | 37 | 8.0×4.5   | III    | III | +++ |
| 43                                                          | M | 45 | 5.0×4.0   | III    | III | +++ |
| 44                                                          | M | 44 | 6.0×5.0   | III    | III | +++ |
| 45                                                          | M | 41 | 9.5×8.0   | III    | III | +++ |
| 46                                                          | F | 57 | 5.5×4.5   | III    | III | +++ |
| 47                                                          | M | 46 | 9.0×8.0   | III    | III | +++ |
| 48                                                          | M | 47 | 4.6×4.0   | III    | III | +++ |
| <hr/>                                                       |   |    |           |        |     |     |
| Non-metastatic HCC (nmHCC group in flow cytometry analysis) |   |    |           |        |     |     |
| <hr/>                                                       |   |    |           |        |     |     |
| 49                                                          | F | 43 | 4.0×2.8   | III    | II  | +   |
| 50                                                          | M | 43 | 11.0×7.0  | III    | III | +   |
| 51                                                          | M | 48 | 4.6×3.2   | II     | I   | +   |
| 52                                                          | M | 45 | 5.0×3.8   | III    | II  | ++  |
| 53                                                          | M | 47 | 3.2×3.5   | III    | I   | +   |
| 54                                                          | M | 39 | 4.0×3.1   | II     | II  | +   |
| 55                                                          | M | 51 | 10.0×9.0  | III    | III | +++ |
| 56                                                          | M | 54 | 5.9×6.0   | II     | III | +   |
| 57                                                          | M | 59 | 12.0×11.0 | II-III | III | +   |
| 58                                                          | M | 53 | 5.0×7.0   | III    | III | +   |
| 59                                                          | M | 44 | 2.3×4.5   | III    | II  | +++ |
| 60                                                          | M | 76 | 7.0×6.0   | III    | III | +   |
| 61                                                          | M | 40 | 6.5×4.5   | III    | III | +   |
| 62                                                          | M | 58 | 6.0×4.2   | II     | III | +   |
| 63                                                          | M | 52 | 5.2×4.0   | II     | III | +   |
| 64                                                          | M | 45 | 3.3×3.0   | III    | II  | ++  |
| 65                                                          | M | 52 | 5.0×4.0   | III    | II  | +   |
| 66                                                          | F | 45 | 10.0×8.0  | III    | III | +   |
| <hr/>                                                       |   |    |           |        |     |     |
| Metastatic HCC (mHCC group in flow cytometry analysis)      |   |    |           |        |     |     |
| <hr/>                                                       |   |    |           |        |     |     |
| 67                                                          | M | 54 | 8.0×11.0  | III    | III | +   |
| 68                                                          | M | 42 | 10.5×8.5  | III    | III | +++ |
| 69                                                          | M | 44 | 15.0×11.0 | III    | III | ++  |
| 70                                                          | F | 62 | 7.9×5.9   | III    | III | +++ |
| 71                                                          | M | 51 | 15.0×10.0 | III    | III | +++ |
| 72                                                          | M | 54 | 11.2×6.8  | III    | III | +++ |
| 73                                                          | M | 52 | 3.4×3.0   | III    | III | +++ |
| 74                                                          | M | 49 | 2.5×2.0   | III    | III | +++ |
| 75                                                          | M | 34 | 7.4×5.5   | III    | III | +   |
| 76                                                          | M | 65 | 10.0×8.6  | III    | III | +   |
| 77                                                          | M | 48 | 6.0×5.2   | III    | III | +   |
| 78                                                          | M | 45 | 9.5×7.2   | III    | III | +++ |

|    |   |    |           |     |     |     |
|----|---|----|-----------|-----|-----|-----|
| 79 | F | 60 | 3.0×2.7   | III | III | +   |
| 80 | M | 58 | 5.0×4.0   | III | II  | +++ |
| 81 | M | 33 | 16.0×11.0 | III | III | ++  |
| 82 | M | 67 | 4.2×3.7   | III | II  | ++  |
| 83 | M | 55 | 14.2×9.4  | III | III | +   |
| 84 | M | 45 | 13.0×8.0  | III | III | +++ |
| 85 | M | 37 | 13.0×9.2  | III | III | ++  |
| 86 | M | 47 | 8.0×5.0   | III | III | +++ |
| 87 | M | 32 | 10.7×7.3  | III | III | ++  |
| 88 | F | 59 | 9.4×7.6   | III | III | +++ |

- a. All patients were positive for hepatitis B virus infection.
- b. M, male; F, female.
- c. +, integrated capsules; ++, infiltrated capsules; +++, none capsules.
