# Supplementary material
Source: PubMed Central journal article supplement (PMC3351911)
Supplement: cr2011139x10.pdf [file cr2011139x10.pdf]

**Supplementary Table 10 Sequences for CD133 and CD44 RNA interference**

| Target Genes | Sequences                 |
|--------------|---------------------------|
| Non-sense    | 5'-TTCTCCGAACGTGTCACG-3'. |
| CD133        | 5'-CATTGGCATCTTCTATGG-3'  |
| CD133        | 5'-TGGAAAGGATCACAGATT-3'  |
| CD44         | 5'-CTGAGGAGCTTCAGCCTC-3'  |
