# Supplementary material
Source: PubMed Central journal article supplement (PMC3351911)
Supplement: cr2011139x11.pdf [file cr2011139x11.pdf]

**Supplementary Table 11 Primer sequences for real-time PCR**

| Target Genes |         | Sequences                      |
|--------------|---------|--------------------------------|
| 18SRNA       | forward | 5'-CGCCGCTAGAGGTGAAATTC-3'     |
|              | reverse | 5'-TTGGCAAATGCTTTCGCTC-3'      |
| MMP2         | forward | 5'-ATGGATCCTGGCTTTC-3'         |
|              | reverse | 5'-GCTTCCAAACTTCACGCTC-3'      |
| MMP9         | forward | 5'-CGGAGTGAGTTGAACCAG-3'       |
|              | reverse | 5'-GTCCCAGTGGGGATTAC-3'        |
| MMP12        | forward | 5'-GATGCACGCACCTCGATGT-3'      |
|              | reverse | 5'-GGCCCCCTGGCATT-3'           |
| Cox2         | forward | 5'-CCCTTGGGTGTCAAAGGTAA-3'     |
|              | reverse | 5'-AACTGATGCGTGAAGTGCTG-3'     |
| DKK3         | forward | 5'-GTAAGTCCCCTCTGGCTTG-3'      |
|              | reverse | 5'-AAGCACCAGACTGTGAAGCCT-3'    |
| CCR5         | forward | 5'-GACGCACTGCTGCATCAA-3'       |
|              | reverse | 5'-CATTTGCAGAAGCGTTTGG-3'      |
| CCL4         | forward | 5'-CGTGTATGACCTGGAAGTGAAGT-3'  |
|              | reverse | 5'-TCCCTGAAGACTTCCTGTCTCTGA-3' |
| CXCL1        | forward | 5'-AACCGAAGTCATAGCCACAC-3'     |
|              | reverse | 5'-GTTGGATTGTCACTGTTTCAGC-3'   |
