# Supplementary material
Source: PubMed Central journal article supplement (PMC3351911)
Supplement: cr2011139x12.pdf [file cr2011139x12.pdf]

**Supplementary Table 12 The convert from CD44<sup>-</sup> cells to CD44<sup>+</sup> cells in cultured SMMC-7721 cells *in vitro***

| CD44 <sup>+</sup> cells %  | Immediately after sorted | 10 days culture <i>in vitro</i> |
|----------------------------|--------------------------|---------------------------------|
| Unsorted cells             | 95.83±1.44               | 95.23±3.71                      |
| CD44 <sup>-</sup> subgroup | 0.46±0.25                | 5.15±2.69                       |
| CD44 <sup>+</sup> subgroup | 99.23±0.30               | 97.95±0.65                      |
