# Supplementary material
Source: PubMed Central journal article supplement (PMC3351911)
Supplement: cr2011139x15.pdf [file cr2011139x15.pdf]

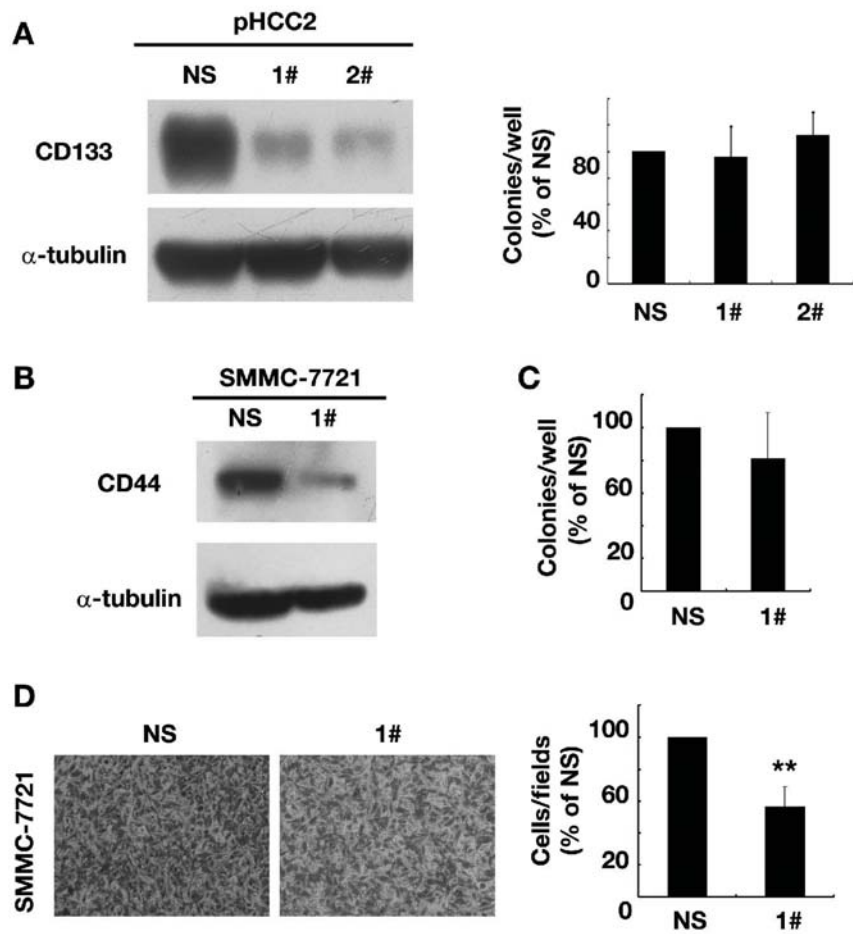

**Fig. S3**

**Figure S3:**

CD133 and CD44 were knocked down by RNAi lenti-virus. (A) Western blot analysis of CD133 levels in pHCC2 cells infected with virus of nonsense (NS) or RNAi 1# and 2# against CD133 (*left*) and the statistical results of colonies formed from infected pHCC2 (*right*). (B) Western blot analysis of CD44 levels in SMMC-7721 cells infected with virus of nonsense (NS) or RNAi 1# against CD44. (C) Statistical results of colony formation of infected SMMC-7721 cells. (D) Representative images of invade cells of infected SMMC-7721 cells through the transwell (*left*) and the statistics (*right*). All results were mean  $\pm$  SD from at least three independent experiments. \*\* $P < 0.01$ .
