# Supplementary material
Source: PubMed Central journal article supplement (PMC3351911)
Supplement: cr2011139x16.pdf [file cr2011139x16.pdf]

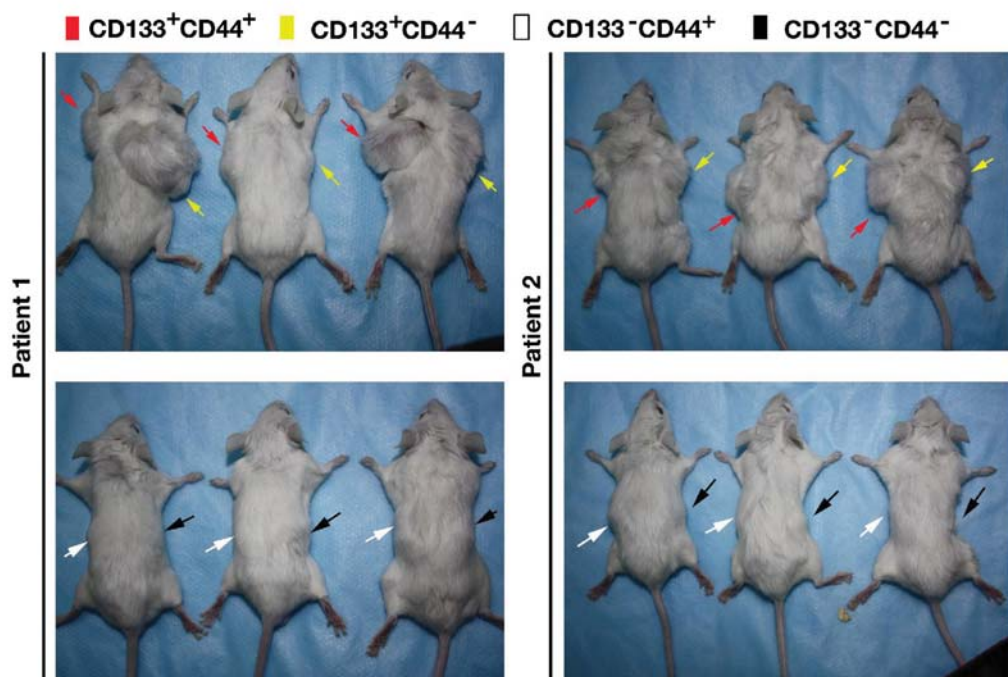

Fig. S4

**Figure S4:**

Tumor formation of different subgroups of tumor cells isolated from human HCC specimens in the SCID mice. CD133<sup>+</sup>CD44<sup>+</sup>, CD133<sup>+</sup>CD44<sup>-</sup>, CD133<sup>-</sup>CD44<sup>+</sup> and CD133<sup>-</sup>CD44<sup>-</sup> tumor cells were isolated from HCC patients and transplanted into the different side of the SCID mice in serial dilutions. Tumors formed by transplantation of 10,000 cells of CD133<sup>+</sup>CD44<sup>+</sup> (*red arrows*) and CD133<sup>+</sup>CD44<sup>-</sup> (*yellow arrows*) subgroups from patient 1 (*upper left*) or 2 (*upper right*). The absence of tumor formation by transplantation of 100,000 cells of CD133<sup>-</sup>CD44<sup>+</sup> (*white arrows*) and CD133<sup>-</sup>CD44<sup>-</sup> (*black arrows*) from patient 1 (*bottom left*) or 2 (*bottom right*).
