# Supplementary material
Source: PubMed Central journal article supplement (PMC3351911)
Supplement: cr2011139x17.pdf [file cr2011139x17.pdf]

**A**

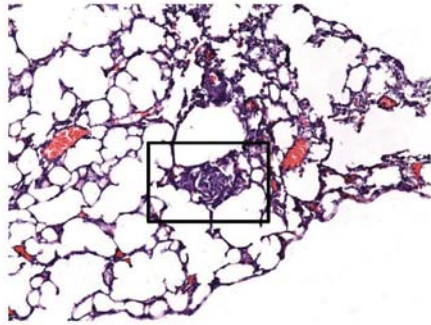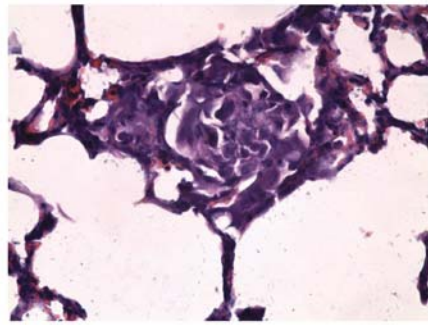

**B**

**Empty vectors**

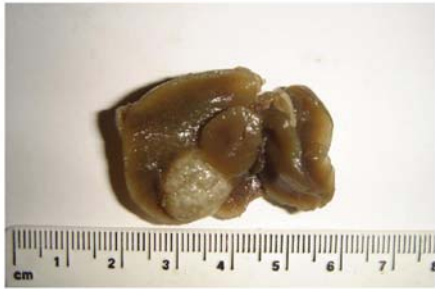

**RNAi virus cocktail**

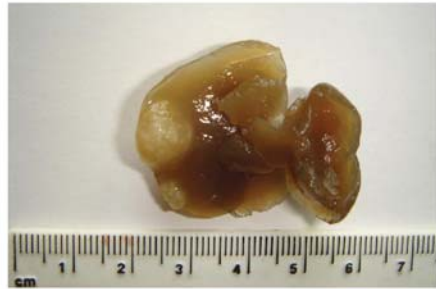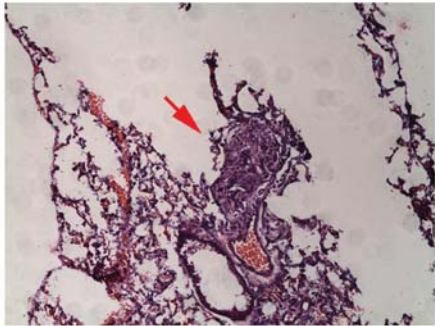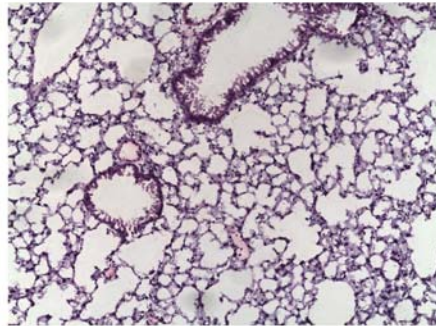

**Fig. S5**

**Figure S5:**

Lung metastasis of MHCC97L cells. (A) Lung micro-metastasis (*left*) induced by intraheaptic implantation of 10,000 CD133<sup>+</sup>CD44<sup>high</sup> MHCC97L cells in nude mice (100×). The rectangle area was enlarged in the *right* (400×). (B) Down-regulation of CD133 and CD44 inhibited lung metastasis of MHCC97L. A total of 10,000 CD133<sup>+</sup>CD44<sup>high</sup> MHCC97L cells infected with lenti-virus with shRNA targeting CD133 and CD44 (*RNAi virus cocktail*) or empty vectors were transplanted into the liver of the nude mice. Represent images of the primary tumor formation (*upper left*) and the lung metastasis (*bottom left*) by the cells infected with the empty vectors (× 100). Represent images of the primary tumor formation (*upper right*) and the absence of lung metastasis (*bottom right*) by the cells infected with RNAi virus cocktail (× 100).
