# Supplementary material
Source: PubMed Central journal article supplement (PMC3351911)
Supplement: cr2011139x19.pdf [file cr2011139x19.pdf]

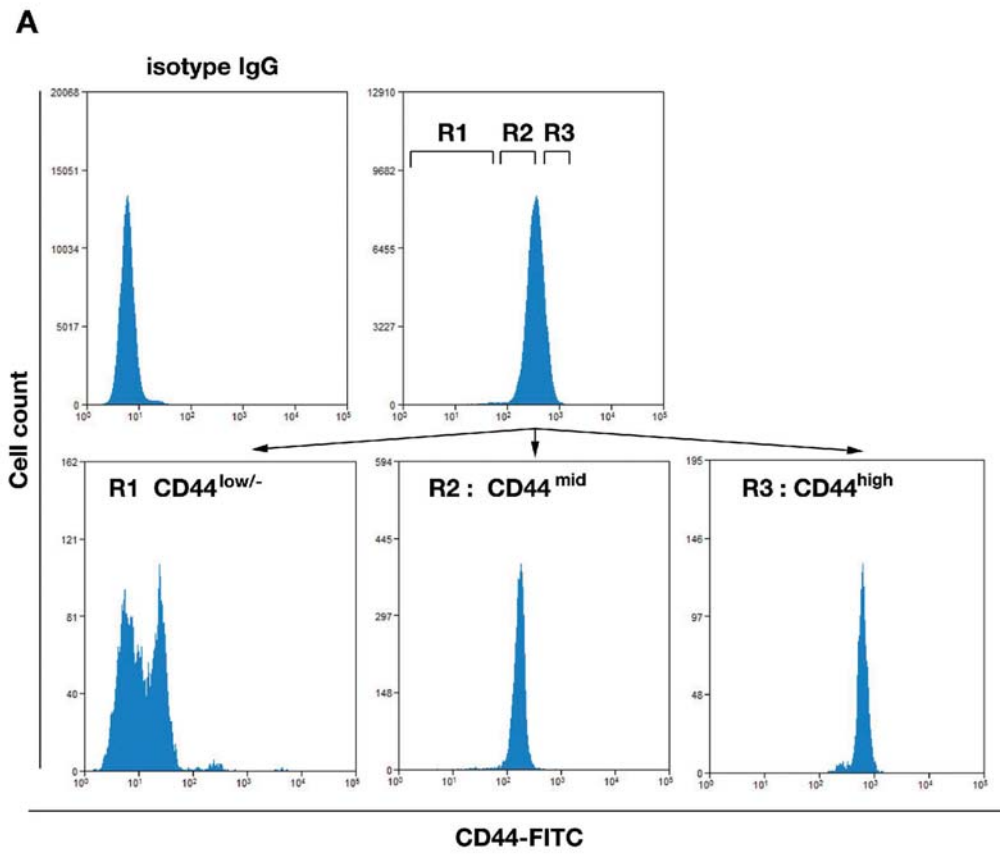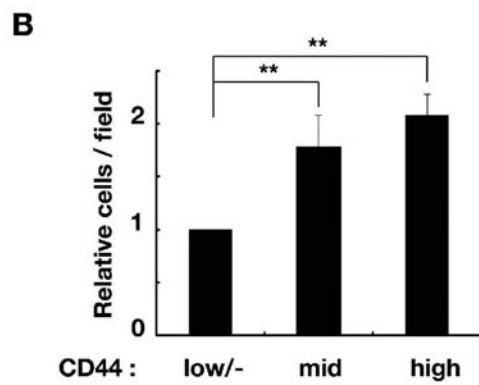

Fig. S7

**Figure S7:**

Invasive ability of different subgroups of SMMC-7721 cells isolated based on CD44 expression. (A) Isolation of different SMMC-7721 subgroups based on CD44 expression. Representative images of isolated subgroups with low or none CD44 expression ( $CD44^{low/-}$ , *bottom left*), moderate CD44 expression ( $CD44^{mid}$ , *bottom middle*), high CD44 expression ( $CD44^{high}$ , *bottom right*). Images of isotype labeling in SMMC-7721 cells were in the *upper left*. (B) Invasive ability of  $CD44^{low/-}$ ,  $CD44^{mid}$ ,  $CD44^{high}$  subgroups of SMMC-7721 cells through the transwell assay. All results were mean  $\pm$  SD from at least three independent experiments. **\*\* $P < 0.01$** .
